# Supplementary material for: Nota doctrinal de la congregación para la doctrina de la fe sobre cuestiones relativas al compromiso y la conducta de los católicos en la vida pública.
Source: Royal Society of Chemistry journal article supplement (doi:10.1039/c9nr02458a), 2003-01-01
Supplement: c9nr02458a1.pdf [file c9nr02458a1.pdf]

### Supplementary material

#### Movie S1.

A movie shows the galvanic replacement reaction between a drop of galinstan and 7.0 mM  $K_2PtCl_4$  for an experimental duration of 4 minutes, however the speed of the presented video is increased by a factor of 4.

**Table S1.** Sample names for GaInSn droplet reacted with platinum salt with varying concentration in different media.

| Sample Name | Concentration of $K_2PtCl_4$ (mM) | Deionised water |   |
|-------------|-----------------------------------|-----------------|---|
| PtGa-1a     | 7.0                               | ✓               |   |
| PtGa-1b     | 5.0                               | ✓               |   |
| PtGa-1c     | 2.5                               | ✓               |   |
| PtGa-1d     | 1.0                               | ✓               |   |
| PtGa-2a     | 7.0                               |                 | ✓ |
| PtGa-2b     | 5.0                               |                 | ✓ |
| PtGa-2c     | 2.5                               |                 | ✓ |
| PtGa-2d     | 1.0                               |                 | ✓ |

**Table S2.** The absorption energies of different stable sites around surface Ga atoms for CO on Pt(111),  $Pt_{35}Ga_1$  (111),  $Pt_{34}Ga_2$  (111) and  $Pt_{33}Ga_3$  (111) in a  $3 \times 3$  Pt(111) slab.

| configuration     | Site       | $E_{absorption}$ (eV) | marker   |
|-------------------|------------|-----------------------|----------|
| $Pt_{36\_CO}$     | Top        | -2.08                 | square   |
|                   | Bridge     | -2.16                 | circle   |
|                   | fcc hollow | -2.21                 | pentagon |
|                   | hcp hollow | -2.16                 | triangle |
| $Pt_{35}Ga_1\_CO$ | Top        | -0.53                 | square   |
|                   | Bridge     | -0.52                 | circle   |
|                   | fcc hollow | -0.52                 | pentagon |
|                   | hcp hollow | -0.52                 | triangle |
| $Pt_{34}Ga_2\_CO$ | Top        | -0.45                 | square   |
|                   | bridge_1   | -0.44                 | circle   |
|                   | bridge_2   | -0.46                 | circle   |
| $Pt_{33}Ga_3\_CO$ | Top        | -0.45                 | square   |
|                   | bridge_1   | -0.47                 | circle   |
|                   | bridge_2   | -0.44                 | circle   |

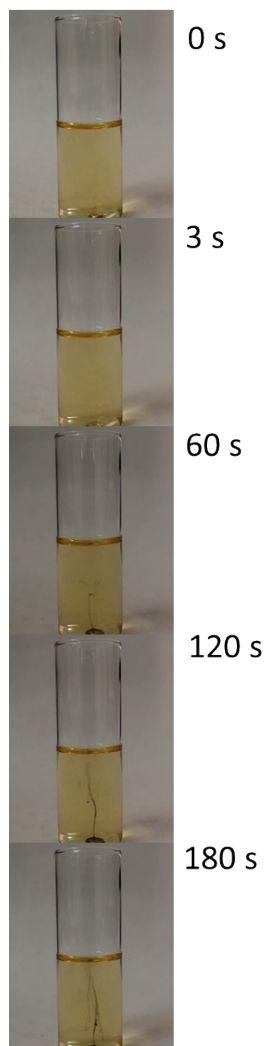

**Figure S1:** Digital images of the galvanic replacement reaction between galinstan and an aqueous solution of 7 mM K<sub>2</sub>PtCl<sub>4</sub> at different times.

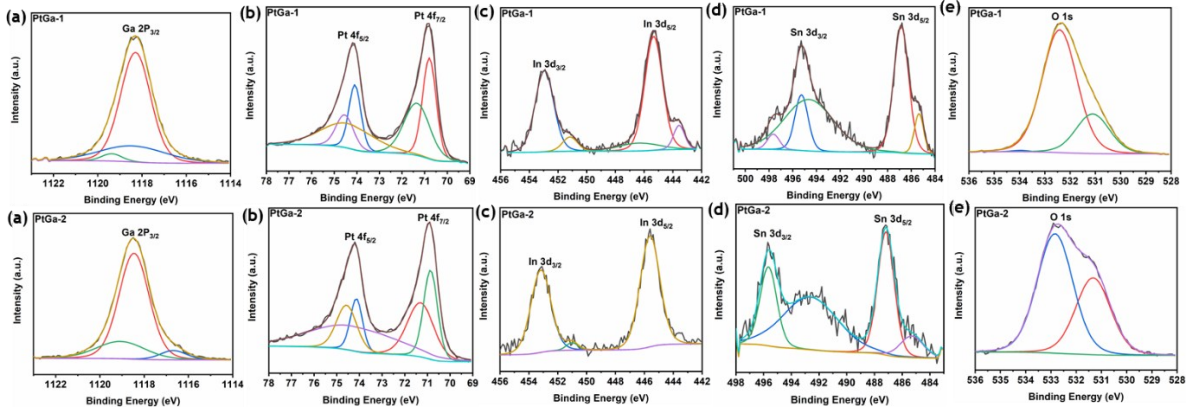

**Figure S2.** XPS spectra of PtGa-1 nanoparticle. (a & b) Ga 2p (c & d) Pt 4f (e & f) In 3d (g & h) Sn 3d (i & j) O 1s.

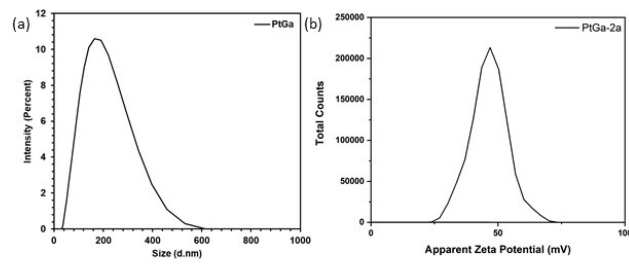

**Figure S3.** (a) The particle size average and (b) zeta potential value for PtGa-2.

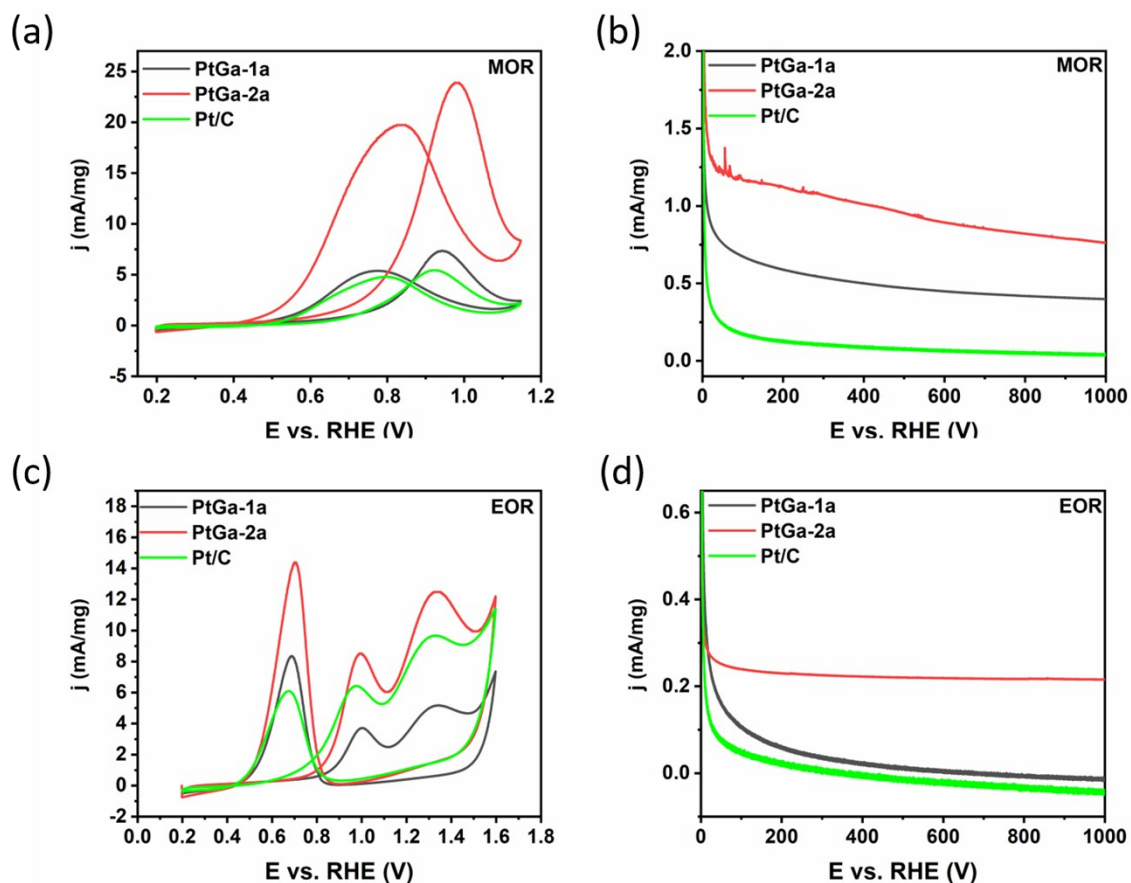

**Figure S4.** Cyclic voltammograms recorded at  $20 \text{ mV s}^{-1}$  in  $1 \text{ M H}_2\text{SO}_4$  containing (a)  $1 \text{ M}$  methanol and (c)  $1 \text{ M}$  ethanol for samples PtGa-1a, PtGa-2a and Pt/C. Chronoamperometric responses recorded at  $1.1 \text{ V}$  in  $1 \text{ M H}_2\text{SO}_4$  containing (b)  $1 \text{ M}$  methanol and (d)  $1 \text{ M}$  ethanol for samples PtGa-1a, PtGa-2a and Pt/C.

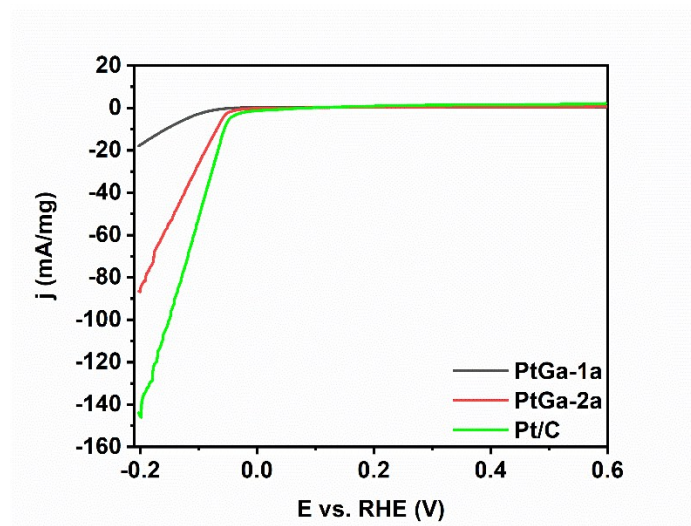

**Figure S5:** Linear sweep voltammograms recorded at  $20 \text{ mV s}^{-1}$  for PtGa-1, PtGa-2 and Pt/C in  $1 \text{ M H}_2\text{SO}_4$
